# Supplementary material for: Toxicity screening and ranking of diverse engineered nanomaterials using established hierarchical testing approaches with a complementary in vivo zebrafish model
Source: Royal Society of Chemistry journal article supplement (doi:10.1039/d2en00265e), 2022-01-01
Supplement: d2en00265e1.pdf [file d2en00265e1.pdf]

## Supplementary information

# Toxicity screening and ranking of diverse engineered nanomaterials using established hierarchical testing approaches with a complementary in vivo zebrafish model

*Jasreen Kaur,<sup>1,2,†</sup> Ikjot Singh Sohal,<sup>3,†</sup> Harpreet Singh,<sup>1</sup> Naveen Kumar Gupta,<sup>1</sup> Sharvan*

*Sehrawat,<sup>5</sup> Sanjeev Puri,<sup>1</sup> Dhimiter Bello,<sup>4,\*</sup> Madhu Khatri,<sup>1,6,\*</sup>*

<sup>1</sup>University Institute of Engineering and Technology (UIET), Panjab University, Sector 14, Chandigarh, India; <sup>2</sup> Centre for Nanoscience and Nanotechnology, Panjab University, Sector 14, Chandigarh, India; <sup>3</sup>Department of Biological Sciences, Purdue University, West Lafayette, Indiana, USA; <sup>4</sup>University of Massachusetts, Lowell, Department of Biomedical and Nutritional Sciences, Zuckerberg College of Health Sciences; 883 Broadway Street, Dugan 108-C, Lowell, MA 01854, USA; <sup>5</sup>Department of Biological Sciences, Indian Institute of Science Education and Research Mohali, Sector 81, SAS Nagar, Punjab, India; <sup>6</sup>DBT/Wellcome trust IA Early Career Fellow.

<sup>†</sup>Equally contributing authors

\*Corresponding authors

Madhu Khatri, PhD

Assistant Professor & DBT/Wellcome trust IA Early Career Fellow

University Institute of Engineering and Technology

Panjab University

Sector-25, Chandigarh, India

[madhuk@pu.ac.in](mailto:madhuk@pu.ac.in)

Tel: +91-9780021944

Dhimiter Bello, ScD, MSc

Professor, Biomedical and Nutritional Sciences

Zuckerberg College of Health Sciences

University of Massachusetts Lowell

883 Broadway Street, Dugan 108-C

Lowell, MA 01854, USA.

[Dhimiter\\_Bello@uml.edu](mailto:Dhimiter_Bello@uml.edu)

Tel: +1 (978) 934-3343

## Results

**Table S1.** Water-soluble ion concentration of nanoparticle dispersions in Holtfreter's medium at

| <b>Nanoparticles</b>             | <b>Concentration of ions in nanoparticle suspension (<math>\mu\text{g/mL}</math>)</b> | <b>% Dissolution in case of nanoparticles</b> |
|----------------------------------|---------------------------------------------------------------------------------------|-----------------------------------------------|
| CuO                              | 29.3                                                                                  | 73.4                                          |
| CeO <sub>2</sub>                 | ND                                                                                    | -                                             |
| TiO <sub>2</sub>                 | 7.2                                                                                   | 14.3                                          |
| ZnO                              | 27.0                                                                                  | 67.2                                          |
| ZnFe <sub>2</sub> O <sub>4</sub> | 7.1                                                                                   | 51.6                                          |

50  $\mu\text{g/mL}$

## Methods

**Table S2.** Summary of major uses of tested nanoparticles in this study.

| Nanoparticles                    | Applications                                                                                                                                                                                                            |
|----------------------------------|-------------------------------------------------------------------------------------------------------------------------------------------------------------------------------------------------------------------------|
| CuO                              | Burning rate catalyst in rocket propellants, catalyst, superconducting materials, ceramics resistors, gas sensors, semiconductors, antibacterial applications, etc.                                                     |
| CeO <sub>2</sub>                 | Oxidation resistant coatings, oxygen sensors, oxygen pumps, heat resistant alloy coatings, coating for infrared filters, biomedicines, drug delivery, catalysts etc.                                                    |
| TiO <sub>2</sub> -A              | Electrodes, solar cells, sunscreens, whitening agent such as in paints, paper, laser toners, antibacterial coatings, cancer treatment, light emitting diodes, solar cells etc.                                          |
| TiO <sub>2</sub> -R              | Antiseptic and antibacterial compositions, UV resistant materials, cosmetic products, paper industry printing ink, laser toners, glass coating etc.                                                                     |
| Qdots                            | Semiconductor devices, imaging, miniature lasers, TV or computer displays, etc.                                                                                                                                         |
| SiO <sub>2</sub>                 | <i>Amorphous:</i> Protein adsorption and separation, drug and gene delivery, fungal resistant materials, molecular imaging, etc.<br><i>Crystalline:</i> Filler in numerous industrial coatings and mortar applications. |
| ZnFe <sub>2</sub> O <sub>4</sub> | Gas sensors, magnetic materials, catalysis, foundry, etc.                                                                                                                                                               |
| ZrO <sub>2</sub>                 | Ceramic pigments, artificial jewelry, abrasive materials, fire retarding material, optical storage, light shutters, etc.                                                                                                |
| ZnO                              | Manufacture of rubber and cigarettes, calamine lotion, ointments to treat skin diseases, concrete additive, food additive, sunscreen, whitening agent in paints, etc.                                                   |
| Au                               | Antibiotic, antifungal, nanowires, catalyst applications, delivery of therapeutic agents, photodynamic therapy, sensors, etc.                                                                                           |

**Table S3.** Primers used for carrying out qPCR reactions for oxidative stress and hatching rate.

| <b>Gene</b>     | <b>Sequence</b>                                                                     |
|-----------------|-------------------------------------------------------------------------------------|
| <b>18s rRNA</b> | Forward – 5' TCGCTAGTTGGCATCGTTTATG 3'<br>Reverse – 5' CGGAGGTTCGAAGACGATCA 3'      |
| <b>GAPDH</b>    | Forward – 5' GTGGAGTCTACTGGTGTCTTC 3'<br>Reverse – 5' GTGCAGGAGGCATTGCTTACA 3'      |
| <b>SOD1</b>     | Forward – 5' AGACCTGGGTAATGTGACCG 3'<br>Reverse – 5' CGGGCTAAGTGCTTTCAGAG 3'        |
| <b>HMOX1</b>    | Forward – 5' GGAAGAGCTGGACAGAAACG 3'<br>Reverse – 5' GACAGATCTCCGAGGTAGCG 3'        |
| <b>GPX1</b>     | Forward – 5' GAGGCACAACAGTCAGGGAT 3'<br>Reverse – 5' TCTCCATAAGGGACACAGG 3'         |
| <b>HN1</b>      | Forward – 5' CTGAACTTCTCTACACACTGAGG 3'<br>Reverse – 5' CCTTATCACC ATCACCTCACTTC 3' |

**Table S4.** LC50 lethal concentration of toxic nanomaterials in zebra fish embryos.

| Nanoparticle        | LC 50 ( $\mu\text{g/ml}$ ) | IC50 (Percentage tail DNA) ( $\mu\text{g/ml}$ ) |
|---------------------|----------------------------|-------------------------------------------------|
| CuO                 | 41.90                      | 4.86                                            |
| CeO <sub>2</sub>    | 24.26                      | 15.08                                           |
| TiO <sub>2</sub> -A | 795.57                     | 163.09                                          |
| Qdots               | 512.8                      | -                                               |
| SiO <sub>2</sub>    | 41.16                      | 13.66                                           |
| ZnO                 | 216.41                     | 5.63                                            |

## Figures

**Figure S1.** SEM images of the nanomaterials in both dry state and after dispersions in the Holtfreter's medium at 50  $\mu\text{g/mL}$  concentration.

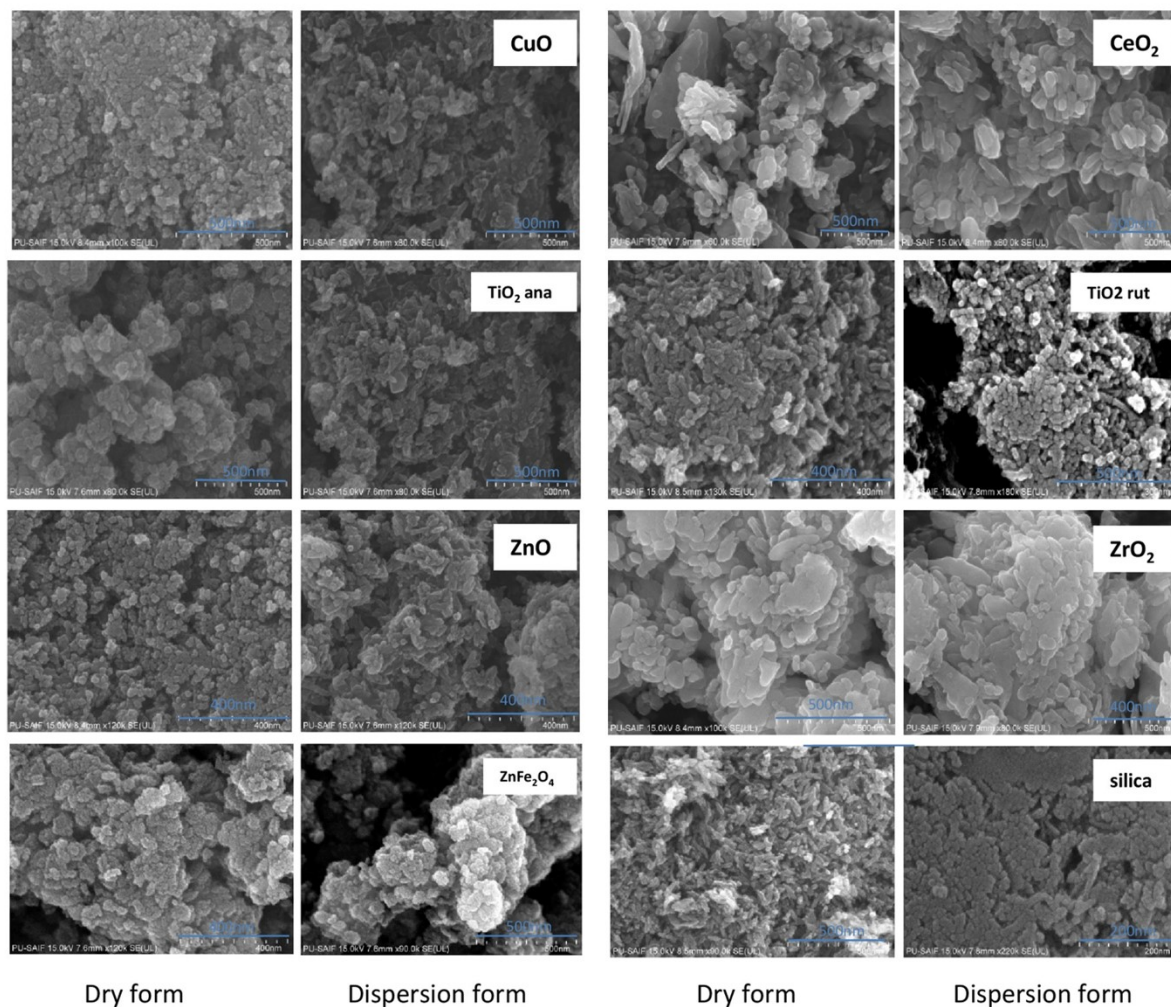

**Figure S2.** Fraction of administered dose delivered over a time period of 24 hours for all ENMs in RPMI media.

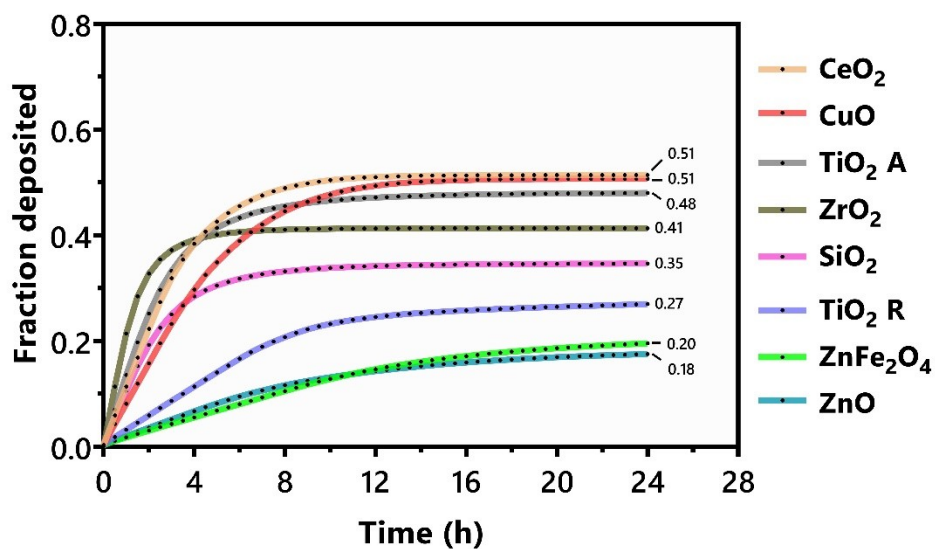

**Figure S3.** Fraction of administered dose delivered over a time period of 24 hours for all ENMs in Holtfreter's media.

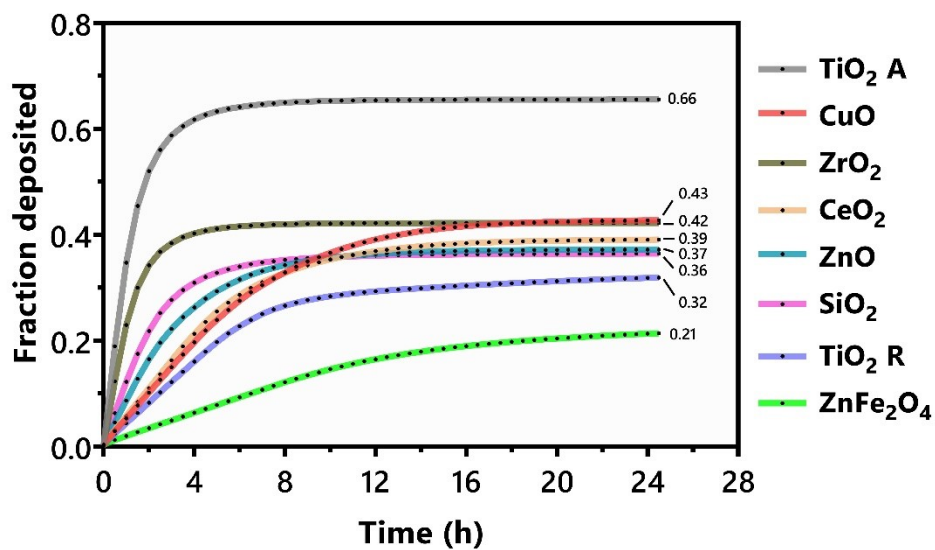



**Figure S4.** Survival rate of zebrafish embryos after treatment with salts of respective ENMs (A) CuO and (B) ZnO at 24, 48, 72, 96 and 120 hrs post

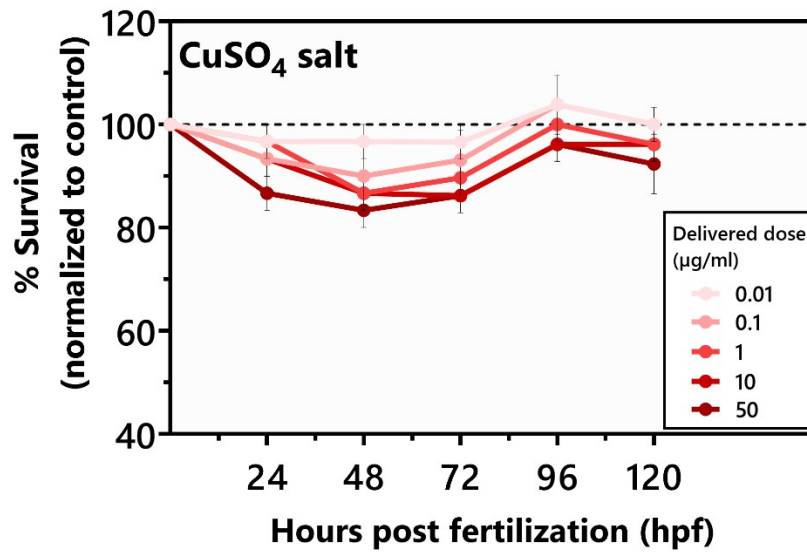

fertilization.

**Certificate**

This is certify that the project title **Chronic nanomaterial toxicity screening using zebra fish model** has been approved by the PU/45/99/CPCSEA/IAEC/2019/387 by the IAEC, Panjab University, Chandigarh (160014).

Number of Animals approved: *20 male/female Danio Reio/  
Zebra fish per year for 24 months*

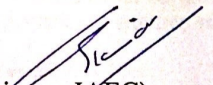  
(Chairman IAEC)

Panjab University

Chandigarh

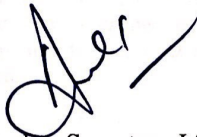  
Member Secretary IAEC

  
CPCSEA Nominee

(Kindly make sure that minutes of the meeting duly signed by all the participants are maintained by Office)
